# Supplementary material for: Double-layer carbon protected CoS2 nanoparticles as an advanced anode for sodium-ion batteries
Source: Royal Society of Chemistry journal article supplement (doi:10.1039/c9ra08558k), 2019-01-01
Supplement: c9ra08558k1.pdf [file c9ra08558k1.pdf]

## **Supplementary Information**

### **Double-layer carbon protected CoS<sub>2</sub> nanoparticles as an advanced anode for sodium-ion batteries**

Xiang Yao, Hui Cheng, Yuping Huang, Zhouyang Jiang, Qingyue Han and Suqing Wang\*

School of Chemistry and Chemical Engineering, Guangdong Provincial Key Lab of Green Chemical Product Technology, South China University of Technology, Guangzhou 510640, P.R. China

\* The corresponding authors: cesqwang@scut.edu.cn

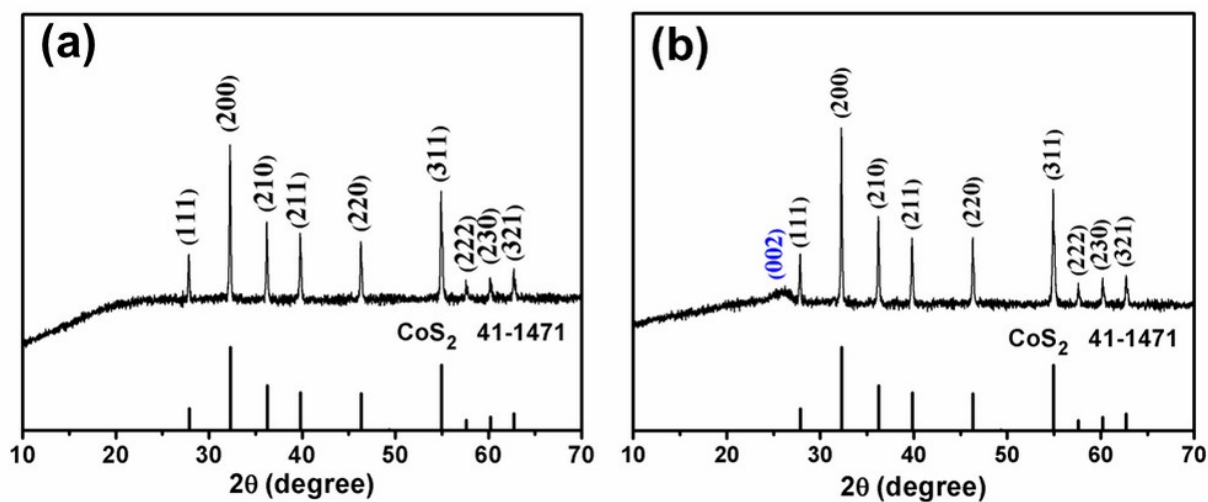

Fig. S1. (a) XRD pattern of the  $\text{CoS}_2$ ; (b) XRD pattern of the  $\text{CoS}_2/\text{CNT}$  composite.

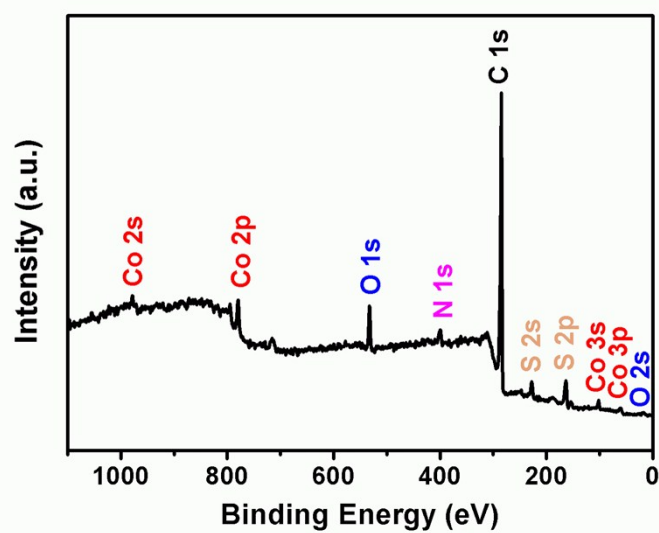

Fig. S2. XPS spectra of the  $\text{CoS}_2@\text{GC}@\text{B-CNT}$ .

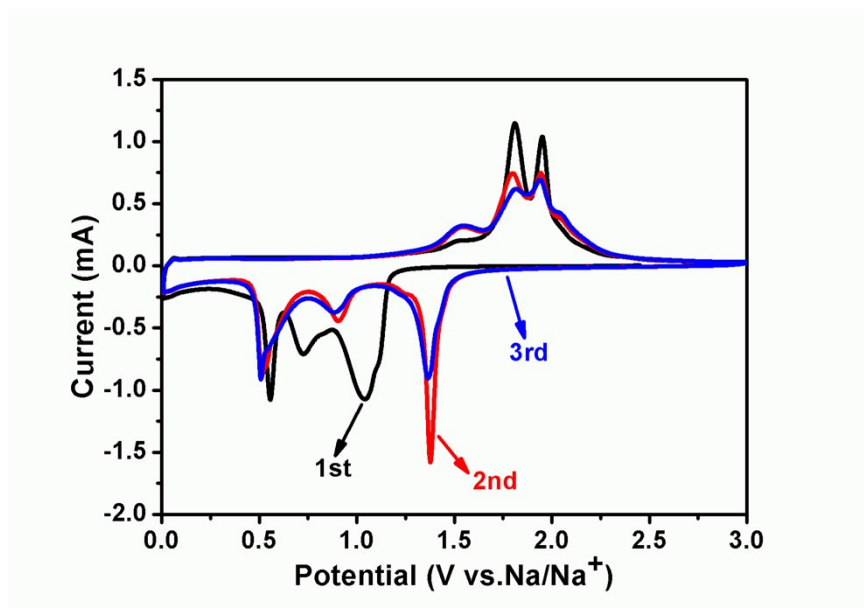

**Fig. S3.** First three CV curves of the CoS<sub>2</sub>@GC@B-CNT electrode at scan rate of 0.2 mV s<sup>-1</sup>.

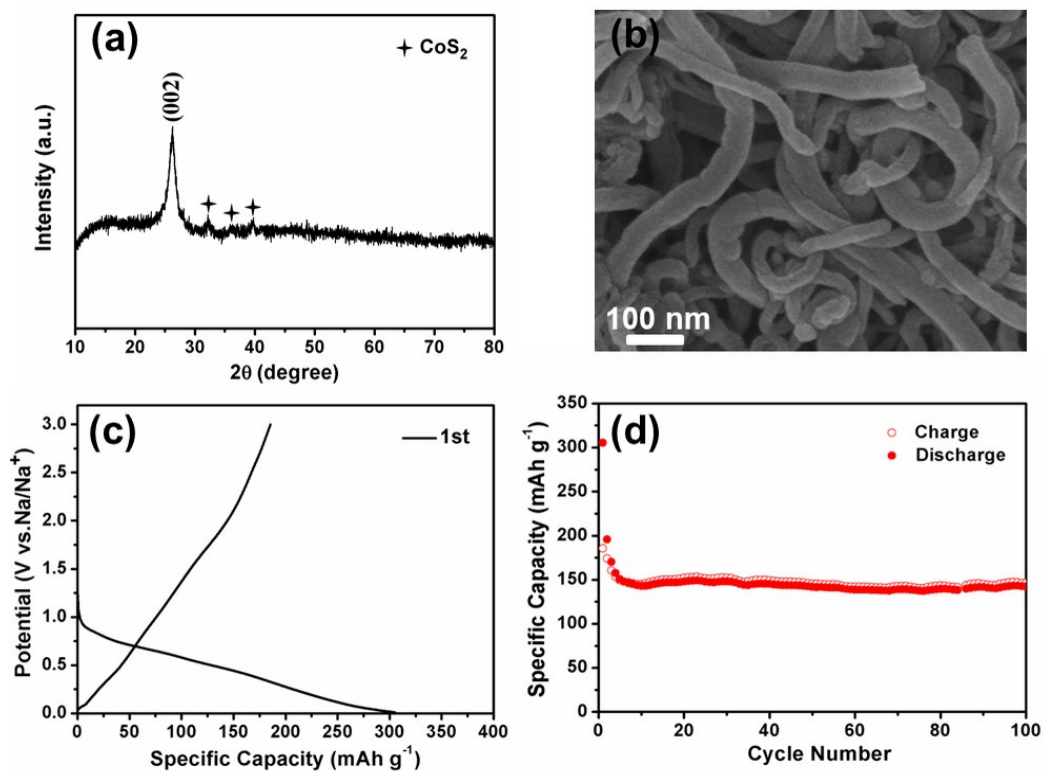

**Fig. S4.** (a) XRD pattern of the B-CNT; (b) SEM image of the B-CNT; (c) First charge/discharge curves of the B-CNT and (d) Cycle performance of the B-CNT at a current density of 0.1 A g<sup>-1</sup> during 100 cycles.

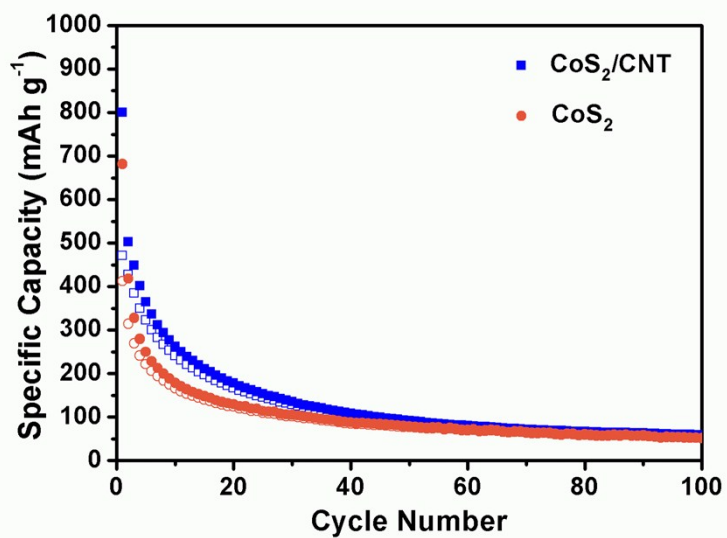

**Fig. S5.** Cycle performance of the  $\text{CoS}_2$  and  $\text{CoS}_2/\text{CNT}$  composite at  $0.1 \text{ A g}^{-1}$ .

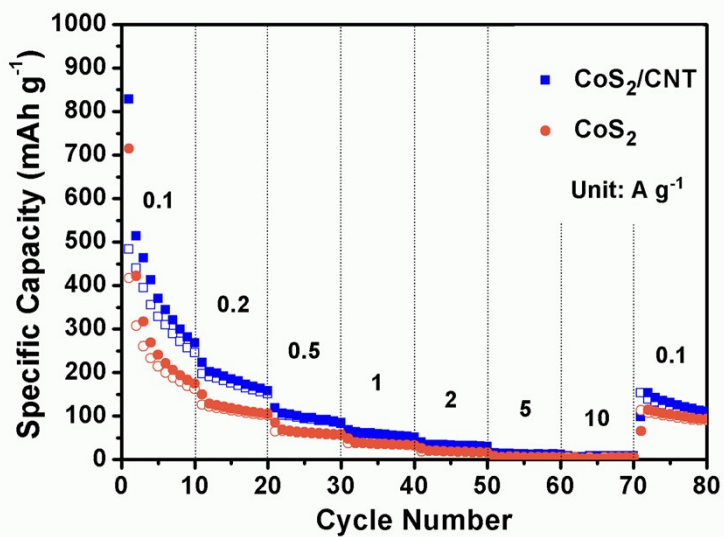

**Fig. S6.** Rate performance of the  $\text{CoS}_2$  and  $\text{CoS}_2/\text{CNT}$  composite under different current densities.

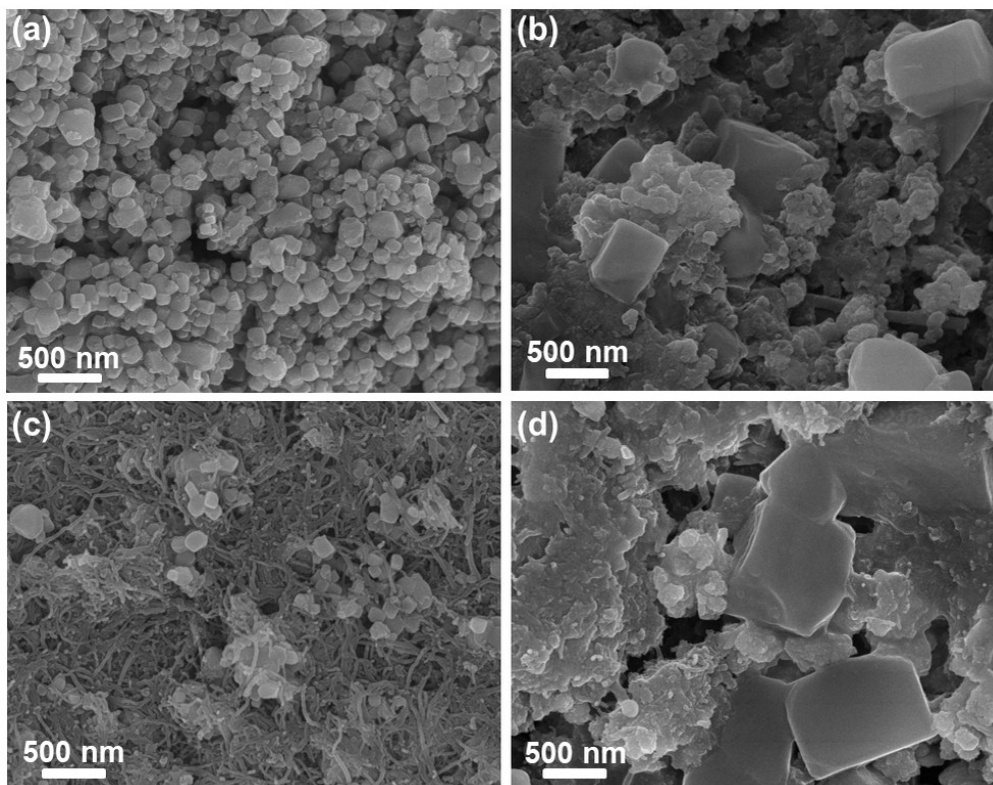

**Fig. S7.** (a) SEM image of bare CoS<sub>2</sub>; (b) SEM image of bare CoS<sub>2</sub> after 100 cycles; (c) SEM image of the CoS<sub>2</sub>/CNT ; (d) SEM image of the CoS<sub>2</sub>/CNT after 100 cycles.

**Table S1.** Comparison of sodium storage performance of various cobalt sulfide-based electrodes in the carbonate ester-based electrolyte.

| Materials                                      | Current density [A g <sup>-1</sup> ] | Cycle number | Specific capacity [mAh g <sup>-1</sup> ] | Current density [A g <sup>-1</sup> ] | Specific capacity [mAh g <sup>-1</sup> ] | Ref.      |
|------------------------------------------------|--------------------------------------|--------------|------------------------------------------|--------------------------------------|------------------------------------------|-----------|
| CoS <sub>2</sub> @GC@B-CNT                     | 0.1<br>5                             | 100          | 550.0                                    | 1                                    | 471.0                                    | This work |
|                                                |                                      | 900          | 432.6                                    | 2                                    | 455.9                                    |           |
|                                                |                                      |              |                                          | 5                                    | 438.0                                    |           |
|                                                |                                      |              |                                          | 10                                   | 419.6                                    |           |
| CoS <sub>2</sub> /multi-walled carbon nanotube | 0.1                                  | 100          | 411                                      | 0.8                                  | 242.3                                    | [S1]      |
| CoS <sub>2</sub> triple-shelled nanoboxes      | 0.2                                  | 100          | 454                                      | 5                                    | 346                                      | [S2]      |

|                                                          |     |     |       |     |       |      |
|----------------------------------------------------------|-----|-----|-------|-----|-------|------|
| Co <sub>3</sub> S <sub>4</sub> @polyaniline<br>nanotubes | 0.2 | 100 | 252.5 | 4   | 184.1 | [S3] |
| CoS nanowires@<br>peapod-like carbon                     | 0.1 | 100 | 294   | 5   | 235   | [S4] |
| CoS <sub>2</sub> -CoS-graphitic<br>carbon microspheres   | 0.2 | 100 | 334   | 1   | 411   | [S5] |
| Co <sub>9</sub> S <sub>8</sub> -carbon                   | 0.5 | 50  | 404   | 1.5 | 326   | [S6] |
| Co <sub>3</sub> S <sub>4</sub> @N-rich carbon            | 0.1 | 100 | 420.9 | 1.4 | 151.2 | [S7] |
| Carbon nanotube<br>/CoS@carbon                           | 0.1 | 100 | 470   | 5   | 276   | [S8] |

## References

- [S1] Z. Shadike, M.-H. Cao, F. Ding, L. Sang and Z. Fu, *Chem. Commun.*, 2015, 51, 10486-10489.
- [S2] X. Wang, Y. Chen, Y. Fang, J. Zhang, S. Gao and X. Lou, *Angew. Chem. Int. Ed.*, 2019, 58, 2675-2679.
- [S3] Q. Zhou, L. Liu, Z. Huang, L. Yi, X. Wang and G. Cao, *J. Mater. Chem. A*, 2016, 4, 5505-5516.
- [S4] C. Wu, Y. Jiang, P. Kopold, P. A. van Aken, J. Maier and Y. Yu, *Adv. Mater.*, 2016, 28, 7276-7283.
- [S5] J.S. Cho, J.M. Won, J.-K. Lee and Y.C. Kang, *Nano Energ*, 2016, 26, 466-478.
- [S6] Y.N. Ko and Y.C. Kang, *Carbon*, 2015, 94, 85-90.
- [S7] Y. Jiang, G. Zou, W. Hong, Y. Zhang, Y. Zhang, H. Shuai, W. Xu, H. Hou and X. Ji, *Nanoscale*, 2018, 10, 18786-18794.
- [S8] F. Han, C.Y.J. Tan and Z. Gao, *J. Power Sources*, 2017, 339, 41-50.
